# Supplementary material
Source: PubMed Central journal article supplement (PMC8314436)

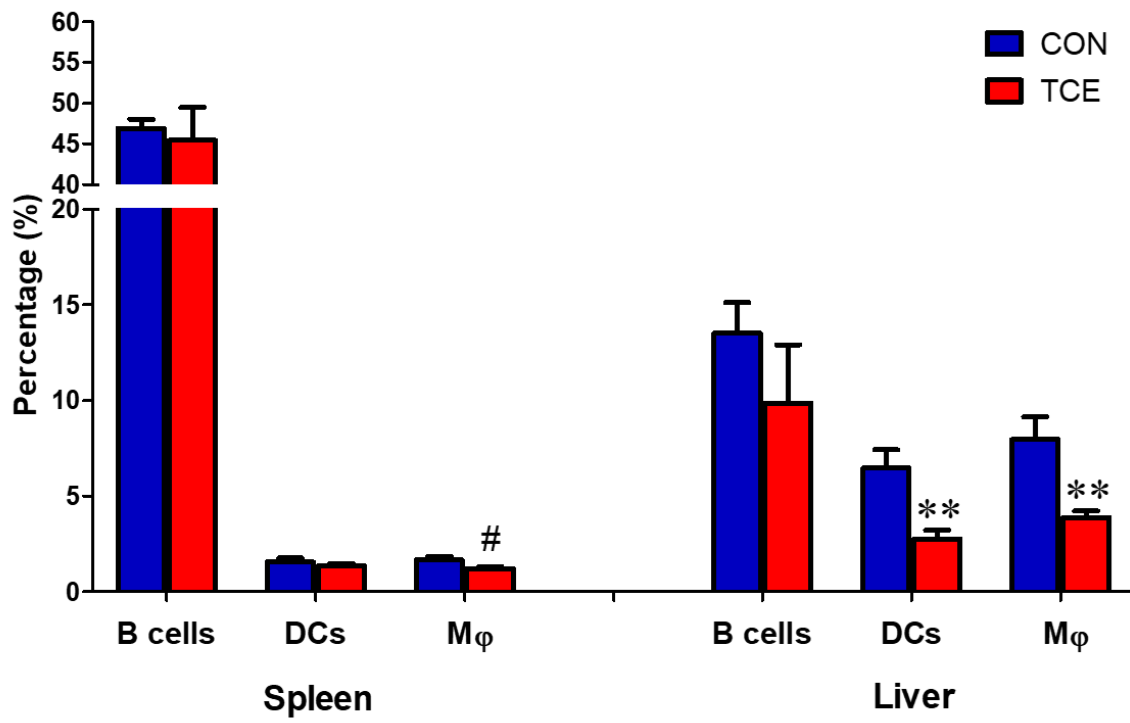

Supp. Figure 1

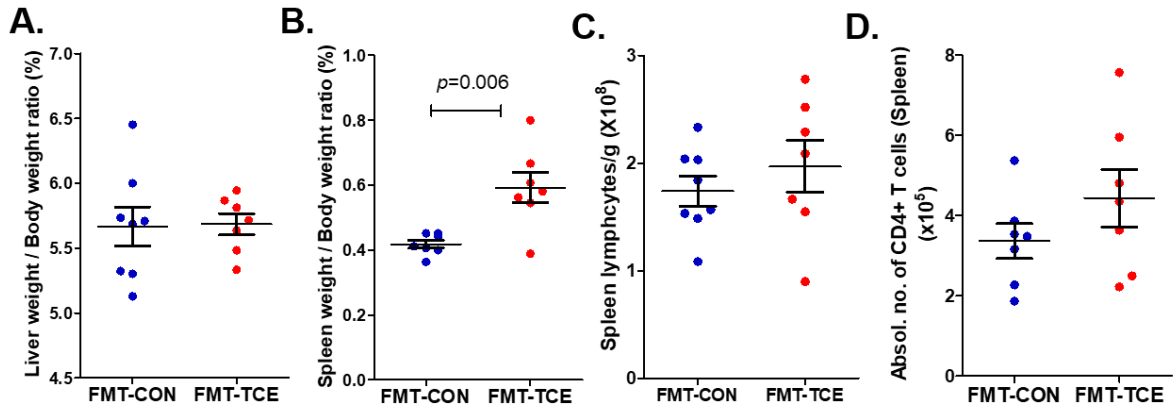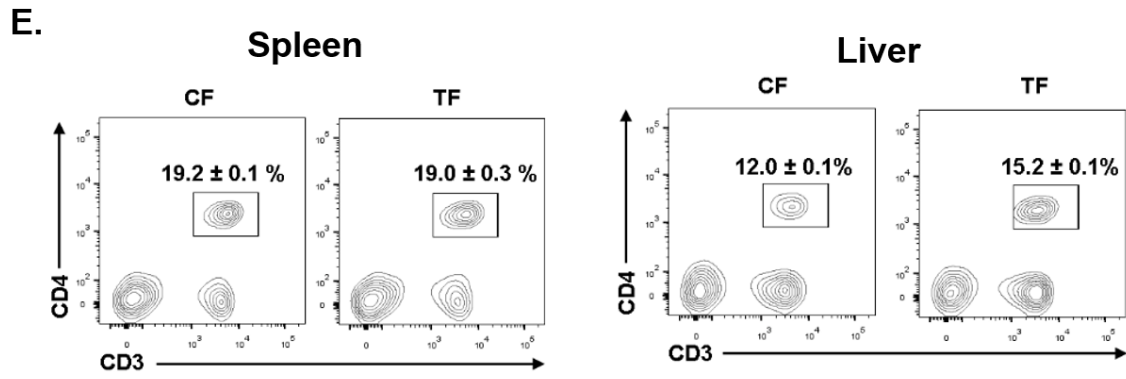

Supp. Figure 2

Supplement: NIHMS1710992-supplement-Sup_Fig_1-2.pdf [file NIHMS1710992-supplement-Sup_Fig_1-2.pdf]
